# Supplementary material
Source: Research Square preprint supplement (doi:10.21203/rs.3.rs-9426691/v1)
Supplement: Supplementary file 1 [file 048cbd19cdc48032dbe97f27.docx]

**Table 2.** A priori distributions of the parameters of the hierarchical Bayesian model

| **Parameter** | **Prior distribution** |
| --- | --- |
| αs (species intercept) | N(ȳ, σα), with σα ∈ [0.5; 2.5], where ȳ = global average of log-intensities |
| βs (temporal trend) | N(0; 0.5) |
| γs (regime shift) | N(0; 0.5) |
| σs (residual dispersion) | HalfNormal (0.5) |
| uc (country random effect) | Non- centered : uc,raw ~ N(0, 1), uc = τ · uc,raw |
| τ (SD random effects) | HalfNormal ( στ ), with στ = clip( sd ( ȳc ), 0.15; 1.0) |
| ν (degrees of freedom Student-t) | Γ(6, 1) |

*Note. The non- centered parameterization for country-level random effects (uc) was adopted to facilitate MCMC convergence in the presence of a large number of groups (181 countries)*. N = normal distribution; Γ = gamma distribution; ȳ = global mean of observed log-intensities; ȳc = mean of log-intensities per country; clip = interval truncation function.
