# Supplementary material
Source: Research Square preprint supplement (doi:10.21203/rs.3.rs-9426691/v1)
Supplement: Supplementary file 2 [file 69a161ed65e0ff3cd757471a.docx]

**Table 7.** Robust portfolio optimization results for the top 20 countries (ordered by absolute reduction, kt CO₂e), δ = 0.10, λ = 0.50, α = 0.90

| **Country** | **Production (tons)** | **Ref. intensity (kg CO₂e/t)** | **Opt. intensity (kg CO₂e/t)** | **Average discount (%)** | **CVaR Reduction (%)** | **Abs. reduction (kt CO₂e)** |
| --- | --- | --- | --- | --- | --- | --- |
| China (cont.) | 46 780 165 | 0.100 | 0.030 | 70.3 | 39.4 | 3,291 |
| Chad | 469 294 | 2,325 | 0.617 | 73.5 | 38.4 | 0.802 |
| Ethiopia | 3 783 826 | 0.266 | 0.116 | 56.4 | 60.5 | 0.568 |
| Iran | 8 477 194 | 0.059 | 0.017 | 70.4 | 43.8 | 0.351 |
| Türkiye | 21 481 567 | 0.028 | 0.017 | 41.0 | 40.6 | 0.251 |
| Mongolia | 250 536 | 1,580 | 0.753 | 52.3 | 19.7 | 0.207 |
| Russia | 33 804 668 | 0.026 | 0.021 | 16.8 | 2.0 | 0.146 |
| Indonesia | 1 373 066 | 0.214 | 0.113 | 47.1 | 37.7 | 0.138 |
| Morocco | 2 046 618 | 0.104 | 0.037 | 64.9 | 26.6 | 0.138 |
| Bangladesh | 14,068,000 | 0.057 | 0.047 | 16.4 | 25.3 | 0.131 |
| Algeria | 3 313 144 | 0.078 | 0.039 | 49.8 | 36.0 | 0.128 |
| Vietnam | 1 246 346 | 0.122 | 0.026 | 78.8 | 6.7 | 0.119 |
| Spain | 8 564 630 | 0.028 | 0.016 | 42.5 | 48.1 | 0.100 |
| Tanzania | 4 317 642 | 0.132 | 0.111 | 15.4 | 15.1 | 0.088 |
| Myanmar | 2 242 390 | 0.112 | 0.076 | 32.6 | 26.8 | 0.082 |
| Senegal | 257 437 | 0.427 | 0.164 | 61.7 | 44.8 | 0.068 |
| Italy | 13 842 200 | 0.025 | 0.020 | 18.8 | 35.4 | 0.064 |
| Yemen | 434 165 | 0.340 | 0.199 | 41.6 | 27.9 | 0.061 |
| Brazil | 36 338 658 | 0.033 | 0.032 | 4.7 | 0.2 | 0.056 |
| Kenya | 6 068 105 | 0.122 | 0.114 | 6.6 | 45.7 | 0.049 |

***Note.*** *Production = total milk production (tonnes, 2023). Ref. intensity = aggregate reference intensity (2023 weights). Opt. intensity = average intensity after optimization. Avg. reduction (%) = percentage reduction in average intensity. CVaR reduction (%) = percentage reduction in conditional value at risk (α = 0.90). Abs. reduction = estimated absolute reduction (kilotons of CO₂e). The do-no-harm restriction was activated globally; none of the top 20 countries required a reversal. Results represent accounting counterfactuals of portfolio reallocation, without claim of causality.*
