# Supplementary material
Source: Research Square preprint supplement (doi:10.21203/rs.3.rs-9426691/v1)
Supplement: Supplementary file 3 [file 6b6e98c38ebd31751b7c5ec8.docx]

**Table 4.** Descriptive statistics of milk production and emissions intensity by species and year (2020–2023, N = 182 countries)

| **Species** | **Year** | **n** | **Average weight** | **Median weight** | **Average intensity (kg CO₂e /t)** | **Median intensity (kg CO₂e /t)** | **Total production ( Mt )** |
| --- | --- | --- | --- | --- | --- | --- | --- |
| Cattle | 2020 | 181 | 0.875 | 0.992 | 0.086 | 0.038 | 740.3 |
|  | 2021 | 181 | 0.876 | 0.992 | 0.085 | 0.038 | 756.9 |
|  | 2022 | 181 | 0.876 | 0.992 | 0.086 | 0.038 | 762.8 |
|  | 2023 | 180 | 0.880 | 0.994 | 0.085 | 0.037 | 777.6 |
| buffalo | 2020 | 20 | 0.170 | 0.068 | 0.756 | 0.289 | 137.8 |
|  | 2021 | 18 | 0.187 | 0.094 | 0.525 | 0.218 | 143.3 |
|  | 2022 | 19 | 0.177 | 0.073 | 0.499 | 0.217 | 148.3 |
|  | 2023 | 19 | 0.174 | 0.070 | 0.480 | 0.205 | 150.2 |
| Goats | 2020 | 105 | 0.122 | 0.030 | 0.552 | 0.184 | 18.7 |
|  | 2021 | 104 | 0.123 | 0.033 | 0.568 | 0.183 | 19.1 |
|  | 2022 | 108 | 0.120 | 0.030 | 0.551 | 0.181 | 20.2 |
|  | 2023 | 102 | 0.123 | 0.034 | 0.614 | 0.182 | 20.4 |
| Sheep | 2020 | 74 | 0.072 | 0.043 | 1,629 | 0.543 | 9.3 |
|  | 2021 | 73 | 0.070 | 0.040 | 1,598 | 0.539 | 9.3 |
|  | 2022 | 74 | 0.069 | 0.040 | 1,732 | 0.562 | 9.2 |
|  | 2023 | 70 | 0.066 | 0.039 | 5,253 | 0.555 | 9.0 |
| camels | 2020 | 27 | 0.079 | 0.008 | 3,425 | 1,165 | 3.9 |
|  | 2021 | 27 | 0.079 | 0.008 | 3,690 | 1,173 | 3.8 |
|  | 2022 | 27 | 0.077 | 0.008 | 3,493 | 1,218 | 3.7 |
|  | 2023 | 27 | 0.078 | 0.008 | 3,829 | 1,159 | 3.9 |

***Note.*** *N = number of countries with reported production for the species in the given year. Weights represent the species' fraction of each country's total milk production (arithmetic mean over countries with non-zero production). Intensities are expressed in kg CO₂e per tonne of milk produced. Mt = megatons. Data source: FAOSTAT, cleaned dataset (2020–2023). Deduplication of the entity 'China' (M49 = 159) reduced the set to 181 countries in the interval analyses.*
