# Supplementary material
Source: Research Square preprint supplement (doi:10.21203/rs.3.rs-9426691/v1)
Supplement: Supplementary file 4 [file 91c0931469e1407cf1df681e.docx]

**Table 1.** Accounting verification of input data (N = 727 country–year observations)

| **Verification** | **Description** | **Tolerance** | **Result** |
| --- | --- | --- | --- |
| Sum of weights | Σs wi,s,t = 1 | 10⁻⁶ | PASS (727/727) |
| Milk totals | Sum of species = aggregate | rel. 10⁻⁶ | PASS (727/727) |
| Mixture identity | Ii,t = Σs wi,s,t · Ii,s,t | 10⁻¹⁰ | PASS (727/727) |

***Note:*** *All 2,181 tests (3 checks × 727 observations) returned a PASS status. The full validation report was stored in the validation_report.csv file.*
