# Supplementary material
Source: Research Square preprint supplement (doi:10.21203/rs.3.rs-9426691/v1)
Supplement: Supplementary file 5 [file a158fb07b711377f9ffda47a.docx]

**Table 3.** Default parameters of robust portfolio optimization

| **Parameter** | **Default value** | **Description** |
| --- | --- | --- |
| δ (reallocation budget) | 0.10 | Maximum fraction of the L₁ norm allowed for weight reallocation |
| λ (average weight/ CVaR ) | 0.50 | Equal weight between mean and CVaR minimization |
| CVaR level ) | 0.90 | CVaR calculated on the upper 10% tail of the distribution |
| Species expansion | Disabled | Absent species cannot be introduced into the mix |

**Note:** The parameters were selected based on a balance between reallocation flexibility and practical feasibility. The sensitivity to parameter variation was systematically assessed (section 2.9).
