# Supplementary material
Source: Research Square preprint supplement (doi:10.21203/rs.3.rs-9426691/v1)
Supplement: Supplementary file 6 [file aa33356b2d8a6d6b23919564.docx]

**Table 8.** Sensitivity analysis of optimization parameters: average intensity reduction (%) on selected configurations (top 20 producing countries)

| **δ** | **λ** | **α** | **Average discount (%)** | **Median reduction (%)** | **Q25 (%)** | **Q75 (%)** |
| --- | --- | --- | --- | --- | --- | --- |
| 0.01 | 0.50 | 0.90 | 5.41 | 0.00 | 0.00 | 4.74 |
| 0.05 | 0.50 | 0.90 | 8.96 | 0.58 | 0.00 | 10.23 |
| 0.10 | 0.50 | 0.90 | 9.98 | 0.58 | 0.00 | 16.51 |
| 0.20 | 0.50 | 0.90 | 10.00 | 0.58 | 0.00 | 16.51 |
| 0.10 | 0.20 | 0.90 | 9.98 | 0.58 | 0.00 | 16.51 |
| 0.10 | 0.80 | 0.90 | 9.98 | 0.58 | 0.00 | 16.51 |
| 0.10 | 0.50 | 0.80 | 9.98 | 0.58 | 0.00 | 16.51 |
| 0.10 | 0.50 | 0.95 | 9.98 | 0.58 | 0.00 | 16.51 |

***Note.*** *δ = reallocation budget (fraction of L₁ norm); λ = average weight vs. CVaR (0 = CVaR only, 1 = average only); α = CVaR level . Reductions are calculated on the 20 countries with the highest absolute reduction potential. Default configuration: δ = 0.10, λ = 0.50, α = 0.90. All 36 configurations of the full grid are available in the supplementary material.*
