# Supplementary material
Source: Research Square preprint supplement (doi:10.21203/rs.3.rs-9426691/v1)
Supplement: Supplementary file 7 [file b526f53d1bfe573713e1197b.docx]

**Table 5.** Shapley decomposition for the top 20 countries (ordered by |Δ total|), 2020–2023

| **Country** | **Δ structure** | **Δ intra-species** | **Δtotal** | **Δ observed** | **Structure (% of total)** |
| --- | --- | --- | --- | --- | --- |
| Mongolia | –15,191 | +14,581 | –0.610 | –0.610 | 2489.2 |
| New Caledonia | 0.000 | +0.304 | +0.304 | +0.304 | 0.0 |
| Brunei Darussalam | –0.009 | –0.206 | –0.216 | –0.216 | 4.3 |
| Chad | +0.013 | +0.187 | +0.200 | +0.200 | 6.7 |
| Trinidad and Tobago | 0.000 | +0.123 | +0.123 | +0.123 | 0.0 |
| Vanuatu | 0.000 | –0.122 | –0.122 | –0.122 | 0.0 |
| Fiji | 0.000 | +0.116 | +0.116 | +0.116 | 0.0 |
| MOZAMBIQUE | +0.023 | +0.091 | +0.114 | +0.114 | 20.5 |
| Nepal | –0.008 | –0.063 | –0.071 | –0.071 | 11.2 |
| Burundi | +0.046 | +0.013 | +0.059 | +0.059 | 78.0 |
| Cuba | +0.004 | +0.051 | +0.054 | +0.054 | 6.7 |
| Guyana | 0.000 | –0.036 | –0.036 | –0.036 | 0.0 |
| Belize | 0.000 | –0.031 | –0.031 | –0.031 | 0.0 |
| French Polynesia | 0.000 | +0.029 | +0.029 | +0.029 | 0.0 |
| Qatar | –0.005 | –0.023 | –0.028 | –0.028 | 18.7 |
| Senegal | +0.002 | –0.029 | –0.027 | –0.027 | –7.5 |
| Cambodia | 0.000 | –0.027 | –0.027 | –0.027 | 0.0 |
| Ivory Coast | 0.000 | –0.026 | –0.026 | –0.026 | 0.0 |
| Vietnam | –0.018 | –0.008 | –0.026 | –0.026 | 68.1 |
| Yemen | –0.001 | –0.025 | –0.026 | –0.026 | 4.4 |

***Note.*** *Δ structure = Shapley effect of species composition change (kg CO₂e/t milk); Δ within-species = Shapley effect of specific intensities change; Δ total = Δ structure + Δ within-species; Δ observed = direct observed variation (I₂₀₂₃ – I₂₀₂₀); Structure (% of total) = percentage contribution of structural effect to total variation. Values are accounting counterfactuals, without causal implication. Mongolia has been excluded from Figure 2 (Δ structure = –15.19; Δ within-species = +14.58).*
