# Supplementary material
Source: Research Square preprint supplement (doi:10.21203/rs.3.rs-9426691/v1)
Supplement: Supplementary file 8 [file f304b5620696aceb323e9304.docx]

**Table 6.** Posterior summary of the main parameters from the hierarchical Bayesian model (16 chains × 8,000 draws)

| **Parameter** | **Average** | **SD** | **HDI 3%** | **HDI 97%** | **MCSE average** | **MCSE SD** | **ESS bulk** | **ESS tail** | **R̂** |
| --- | --- | --- | --- | --- | --- | --- | --- | --- | --- |
| α_s[buffalo] | –1.538 | 0.151 | –1.822 | –1.254 | 0.001 | 0.000 | 77 218 | 83,931 | 1.00 |
| α_s[camels] | –0.453 | 0.253 | –0.918 | 0.033 | 0.001 | 0.001 | 89 940 | 93,396 | 1.00 |
| α_s[cattle] | –3.083 | 0.003 | –3,090 | –3.077 | 0.000 | 0.000 | 9 719 | 22 163 | 1.00 |
| α_s[goats] | –1.835 | 0.121 | –2.059 | –1.604 | 0.000 | 0.000 | 73 718 | 87 255 | 1.00 |
| α_s[sheep] | –0.638 | 0.130 | –0.883 | –0.395 | 0.000 | 0.000 | 76 869 | 89,442 | 1.00 |
| β_s[buffalo] | –0.051 | 0.144 | –0.323 | 0.218 | 0.001 | 0.000 | 38,958 | 61,755 | 1.00 |
| β_s[camels] | 0.049 | 0.196 | –0.319 | 0.417 | 0.001 | 0.001 | 52,434 | 75 359 | 1.00 |
| β_s[cattle] | –0.006 | 0.002 | –0.010 | –0.002 | 0.000 | 0.000 | 26,679 | 44 926 | 1.00 |
| β_s[goats] | 0.004 | 0.121 | –0.224 | 0.232 | 0.001 | 0.000 | 34,600 | 54 678 | 1.00 |
| β_s[sheep] | 0.019 | 0.129 | –0.228 | 0.257 | 0.001 | 0.000 | 37 296 | 59,941 | 1.00 |
| γ_s [buffaloes] | 0.024 | 0.303 | –0.549 | 0.595 | 0.001 | 0.001 | 44,898 | 70 857 | 1.00 |
| γ_s [camels] | –0.013 | 0.388 | –0.734 | 0.729 | 0.002 | 0.001 | 66,596 | 86 087 | 1.00 |
| γ_s [cattle] | 0.004 | 0.004 | –0.004 | 0.013 | 0.000 | 0.000 | 29,614 | 50 338 | 1.00 |
| γ_s [goats] | 0.005 | 0.262 | –0.479 | 0.507 | 0.001 | 0.001 | 39,443 | 61,337 | 1.00 |
| γ_s [sheep] | –0.000 | 0.276 | –0.522 | 0.516 | 0.001 | 0.001 | 42 870 | 66,397 | 1.00 |
| σ_s [buffaloes] | 0.592 | 0.079 | 0.449 | 0.741 | 0.000 | 0.000 | 206 137 | 93 462 | 1.00 |
| σ_s [camels] | 1,143 | 0.111 | 0.938 | 1,351 | 0.000 | 0.000 | 233 048 | 95 557 | 1.00 |
| σ_s [cattle] | 0.021 | 0.002 | 0.018 | 0.024 | 0.000 | 0.000 | 36 153 | 67 695 | 1.00 |
| σ_s [goats] | 1,058 | 0.057 | 0.952 | 1,166 | 0.000 | 0.000 | 150 121 | 96 348 | 1.00 |
| σ_s [sheep] | 0.964 | 0.061 | 0.851 | 1,078 | 0.000 | 0.000 | 176 357 | 94 626 | 1.00 |
| n | 1,947 | 0.143 | 1,683 | 2,217 | 0.001 | 0.000 | 51 176 | 81 742 | 1.00 |
| τ | 1,047 | 0.058 | 0.945 | 1,156 | 0.007 | 0.003 | 65 | 189 | 1.19 |

***Note.*** *αs = species intercept (log-scale); βs = annual time trend; γs = regime shift (t ≥ 2022); σs = species residual variance; ν = degrees of freedom of the Student-t distribution; τ = standard deviation of country-level random effects. HDI = highest posterior density interval (94%). ESS = effective sample size. MCSE = Monte Carlo standard error. R̂ = Gelman –Rubin convergence statistic . ⚠ The τ parameter did not reach strict convergence (R̂ < 1.01, ESS ≥ 400).*
